# Supplementary material
Source: Springer Nature journal article supplement (https://www.springermedizin.de/resource/supplementary/12936_2013_2785_MOESM5_ESM.pdf/9544252)

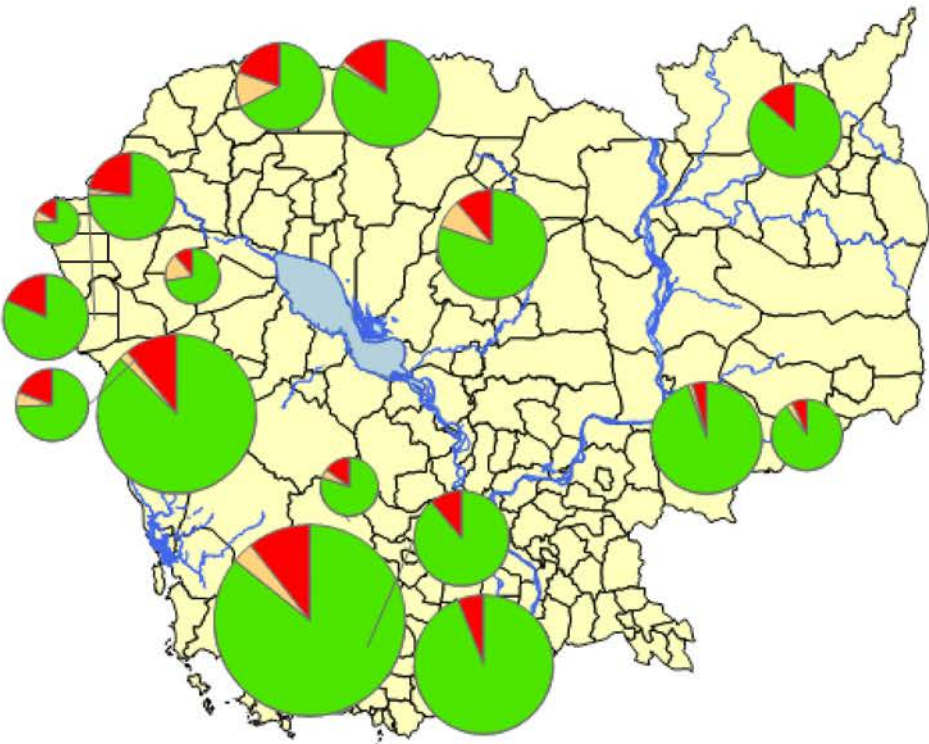

*P. falciparum* (N=1050)

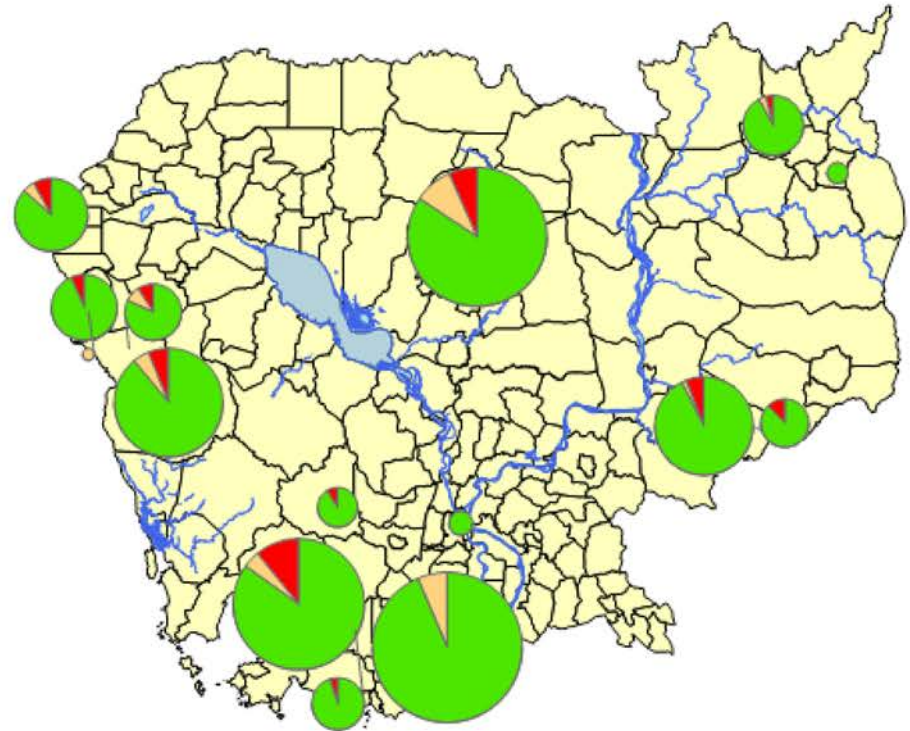

*P. vivax* (N= 735)

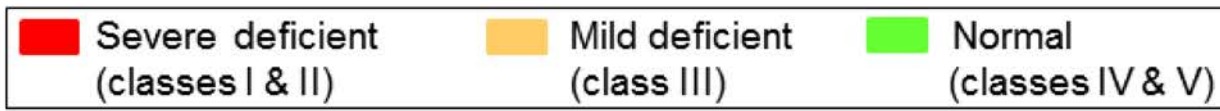

Supplement: MOESM5 [file 9544252]
